# Supplementary material for: Rapid Microfluidic Preparation of Niosomes for Targeted Drug Delivery
Source: MDPI journal article supplement (doi:10.3390/ijms20194696), 2019-09-22
Supplement: s1 [file s1]

# Rapid microfluidic preparation of niosomes for targeted drug delivery

Didem Ag Selec, Viktor Maurer, Frank Stahl, Thomas Scheper and Georg Garnweitner

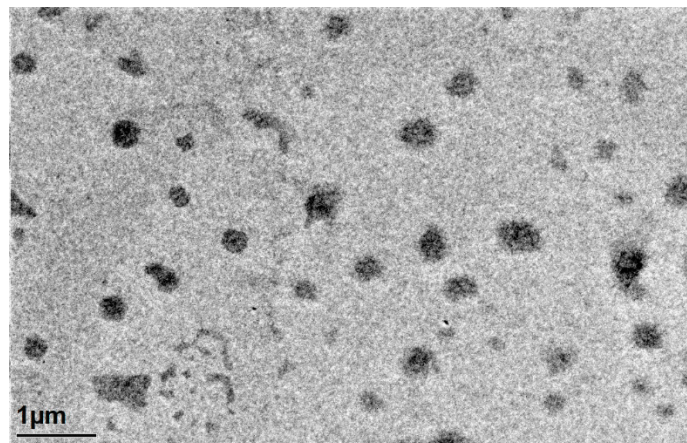

**Figure S1.** TEM micrograph of niosomes stained with 2 % phosphotungstic acid.
